# Supplementary material for: Molecular Linking Selectivity on Self-Assembled Metal-Semiconductor Nano-Hybrid Systems
Source: MDPI journal article supplement (doi:10.3390/nano10071378), 2020-07-15
Supplement: s1 [file s1]

# Supporting Information

## For

# Molecular Linking Selectivity on Self-Assembled Metal-Semiconductor Nano-Hybrid Systems

Thinh Luong The Nguyen <sup>1,†</sup>, Alba Gascón Nicolás <sup>1,†</sup>, Tomas Edvinsson <sup>2</sup>, Jie Meng <sup>3</sup>,  
Kaibo Zheng <sup>3,4</sup>, Mohamed Abdellah <sup>1,5,6,\*</sup> and Jacinto Sá <sup>1,6,7,\*</sup>

<sup>1</sup> Department of Chemistry – Ångström Laboratory, Uppsala University, Box 532, 751 20 Uppsala, Sweden; [luongthethinh.nguyen.9036@student.uu.se](mailto:luongthethinh.nguyen.9036@student.uu.se) (T.L.T.N.); [albagasconnicolas@gmail.com](mailto:albagasconnicolas@gmail.com) (A.G.N.)

<sup>2</sup> Department of Materials Science and Engineering – Solid State Physics, Uppsala University, Box 35, 751 03 Uppsala, Sweden; [tomas.edvinsson@angstrom.uu.se](mailto:tomas.edvinsson@angstrom.uu.se)

<sup>3</sup> Department of Chemistry, Technical University of Denmark, DK-2800 Kongens Lyngby, Denmark; [jmen@kemi.dtu.dk](mailto:jmen@kemi.dtu.dk) (J.M.); [kaibo.zheng@chemphys.lu.se](mailto:kaibo.zheng@chemphys.lu.se) (K.Z.)

<sup>4</sup> Chemical Physics and NanoLund, Lund University, Box 124, 22100 Lund, Sweden

<sup>5</sup> Department of Chemistry, Qena Faculty of Science, South Valley University, 83523 Qena, Egypt

<sup>6</sup> Peafowl Solar Power AB, Henry Sälde's väg 10, 756 43 Uppsala, Sweden

<sup>7</sup> Institute of Physical Chemistry, Polish Academy of Sciences, 01-224 Warsaw, Poland

\* Correspondence: [mo.abdellah@peafowlsolarpower.com](mailto:mo.abdellah@peafowlsolarpower.com) (M.A.); [jacinto.sa@kemi.uu.se](mailto:jacinto.sa@kemi.uu.se) (J.S.)

† Equal contribution.

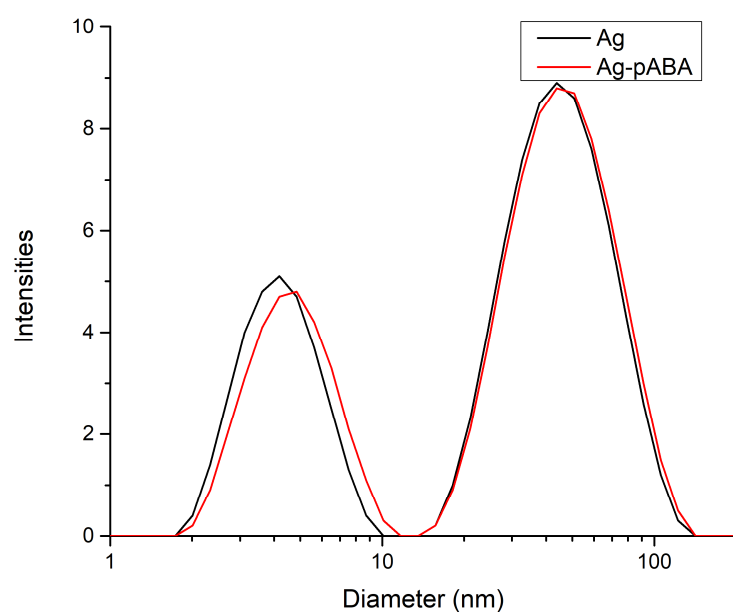

**Figure S1.** Dynamic light scattering (DLS) of Ag NPs (black trace), and Ag-pABA (red trace).

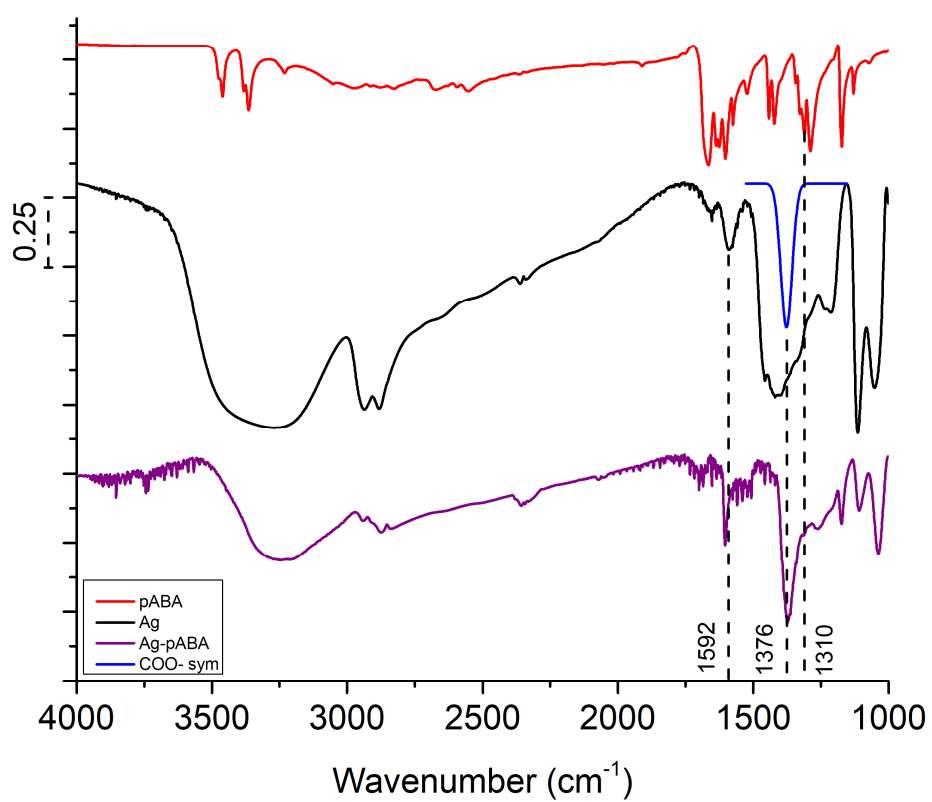

**Figure S2.** FTIR spectra of pABA (red trace), Ag NPs (black trace), and Ag-pABA (purple trace). The fit peak (blue trace) was obtained from deconvolution, showing COO<sup>-</sup> symmetric stretching.

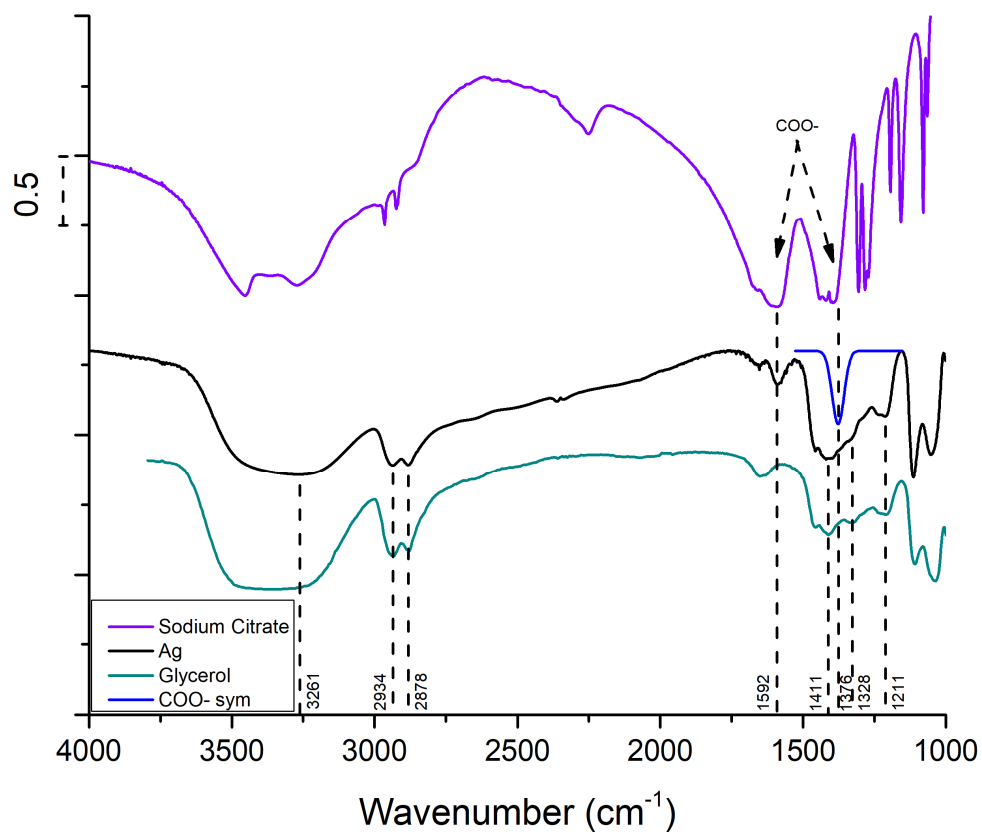

**Figure S3.** FTIR spectra of Ag NPs (black trace) along with sodium citrate (violet trace), and glycerol (cyan trace). Even after washing, the signal from glycerol is present in Ag NPs.

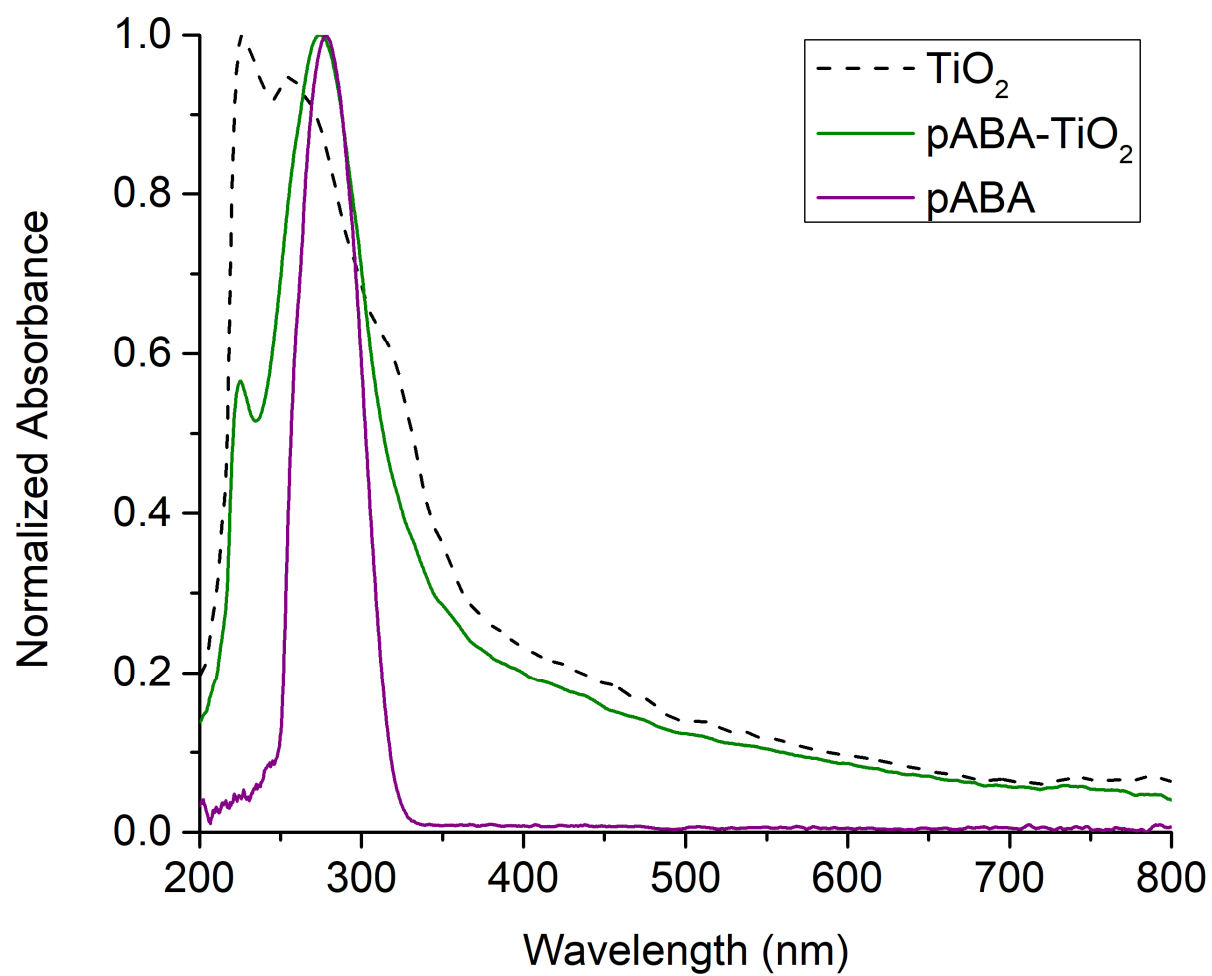

**Figure S4.** UV-Vis spectra of  $\text{TiO}_2$  (black dashed trace), pABA (purple trace) and pABA on  $\text{TiO}_2$  (green trace).

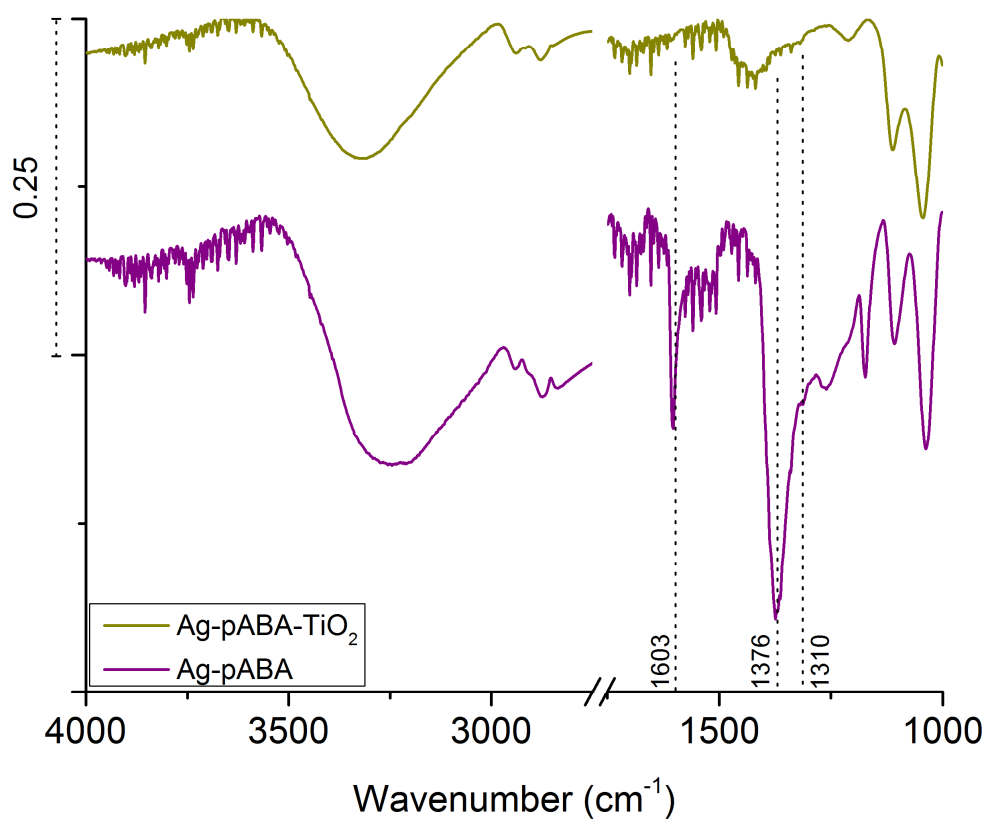

**Figure S5.** FTIR spectra of Ag-pABA-TiO<sub>2</sub> (dark yellow), and Ag-pABA (purple trace).

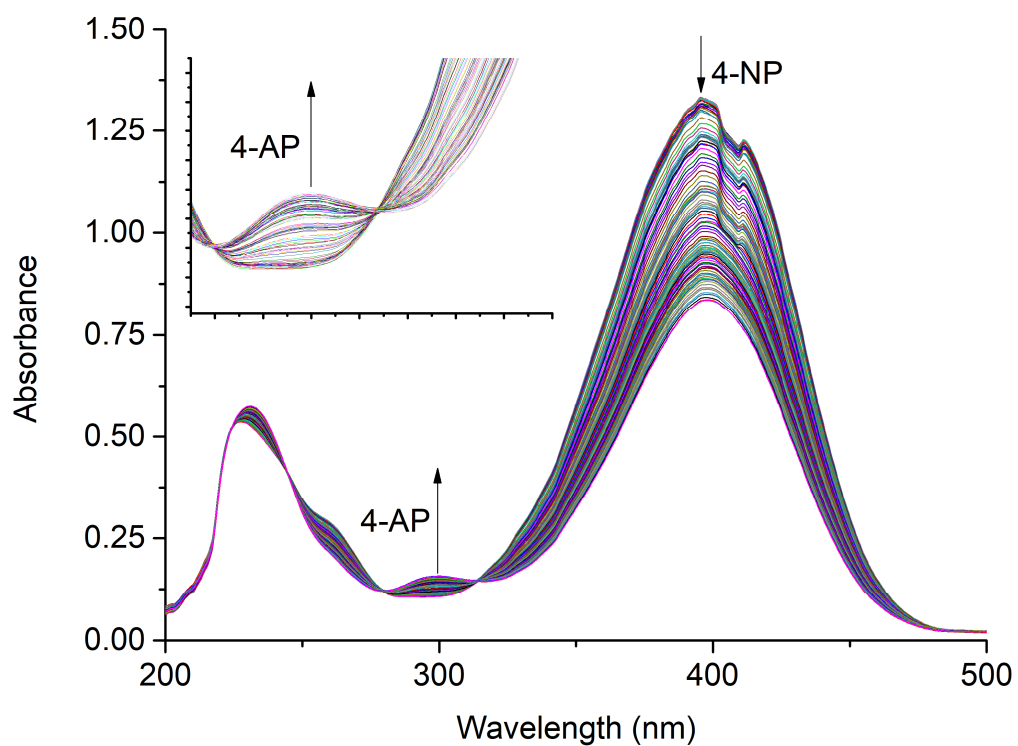

**Figure S6.** Temporal evolution of the UV-Vis spectra of the catalytic reaction using Ag-pABA-TiO<sub>2</sub> (10 µg/mL) and 405 nm laser excitation. Spectra recorded over 60 min.

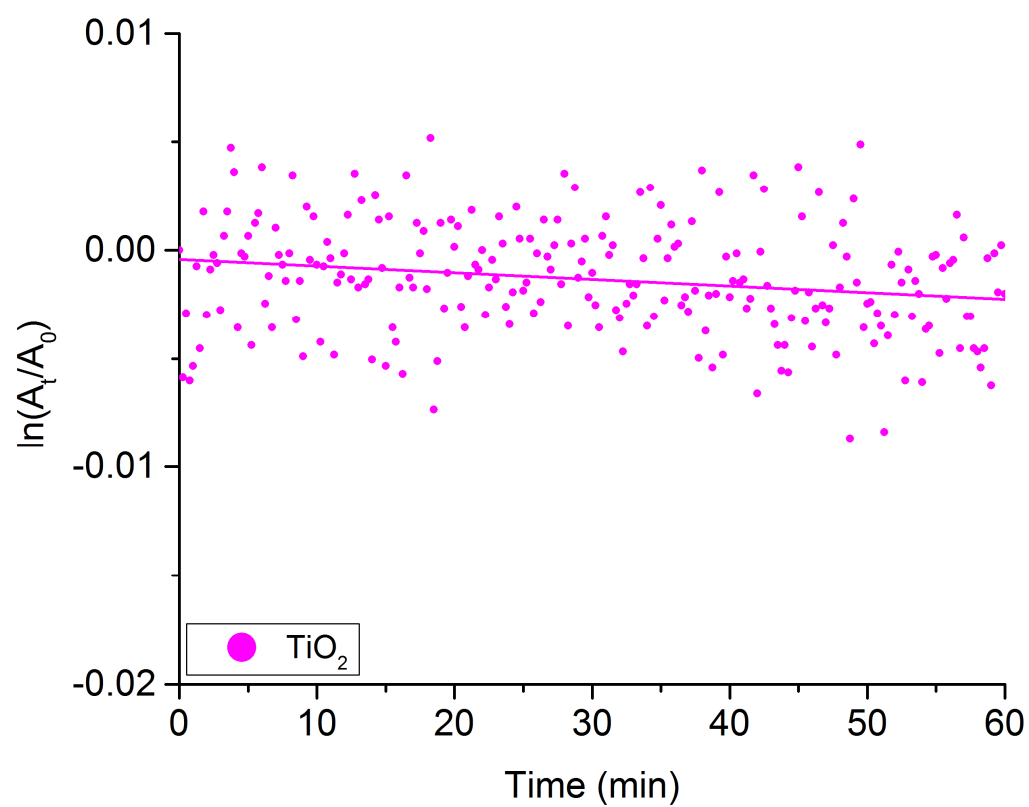

Figure S7. The disappearance rate of 4-NP using bare  $\text{TiO}_2$ , with laser excitation.
